# Supplementary material
Source: PubMed Central journal article supplement (PMC10391051)
Supplement: jmcp.2021.27.11.1579_s001.pdf [file jmcp.2021.27.11.1579_s001.pdf]

## **SUPPLEMENTARY MATERIALS**

### **Cardiovascular risk prediction model and stratification in patients with type 2 diabetes enrolled in a Medicare Advantage plan**

Eleanor O Caplan, PharmD, PhD; Jennifer Hayden, MS; Pratik Pimple, MBBS, MPH, PhD; Rakesh Luthra, BPharm, MS; Todd Prewitt, MD; Vinay Chiguluri, MPH; Michael W Kattan, PhD; Ashley Goss, PhD; and Raymond Harvey, MPH

**Supplementary Table 1. Cardiovascular Event Codes**

**Supplementary Table 2. Complete case vs. imputed**

**Supplementary Table 3. Test versus holdout dataset**

**Supplementary Table 4. Model performance statistics**

**Supplementary Figure 1. Kaplan-Meier Survival Curves for CV Events Occurring up to 5 Years**

**Supplementary Table 1. Cardiovascular Event Codes**

| <b>Variable</b>              | <b>ICD-9</b>                                                                                                                                                                                                                                                                                 | <b>ICD-10</b>                                                                                               | <b>HCPCS/CPT</b> |
|------------------------------|----------------------------------------------------------------------------------------------------------------------------------------------------------------------------------------------------------------------------------------------------------------------------------------------|-------------------------------------------------------------------------------------------------------------|------------------|
| <b>Cardiovascular events</b> |                                                                                                                                                                                                                                                                                              |                                                                                                             |                  |
| <b>Myocardial Infarction</b> | 410<br>410.01<br>410.02<br>410.1<br>410.11<br>410.12<br>410.2<br>410.21<br>410.22<br>410.3<br>410.31<br>410.32<br>410.4<br>410.41<br>410.42<br>410.5<br>410.51<br>410.52<br>410.6<br>410.61<br>410.62<br>410.7<br>410.71<br>410.72<br>410.8<br>410.81<br>410.82<br>410.9<br>410.91<br>410.92 | I2101<br>I2102<br>I2109<br>I2111<br>I2119<br>I2121<br>I2129<br>I213<br>I214<br>I220<br>I221<br>I222<br>I228 |                  |
| <b>Ischemic stroke</b>       | 434.01<br>434.91<br>433.01<br>433.11<br>433.21                                                                                                                                                                                                                                               | I6300<br>I63011<br>I63012<br>I63013<br>I63019                                                               |                  |

| Variable | ICD-9  | ICD-10 | HCPCS/CPT |
|----------|--------|--------|-----------|
|          | 433.31 | I6302  |           |
|          | 433.81 | I63031 |           |
|          | 433.91 | I63032 |           |
|          |        | I63033 |           |
|          |        | I63039 |           |
|          |        | I6309  |           |
|          |        | I6320  |           |
|          |        | I63211 |           |
|          |        | I63212 |           |
|          |        | I63213 |           |
|          |        | I63219 |           |
|          |        | I6322  |           |
|          |        | I63231 |           |
|          |        | I63232 |           |
|          |        | I63233 |           |
|          |        | I63239 |           |
|          |        | I6329  |           |
|          |        | I6330  |           |
|          |        | I63311 |           |
|          |        | I63312 |           |
|          |        | I63313 |           |
|          |        | I63319 |           |
|          |        | I63321 |           |
|          |        | I63322 |           |
|          |        | I63323 |           |
|          |        | I63329 |           |
|          |        | I63331 |           |
|          |        | I63332 |           |
|          |        | I63333 |           |
|          |        | I63339 |           |
|          |        | I63341 |           |
|          |        | I63342 |           |
|          |        | I63343 |           |
|          |        | I63349 |           |
|          |        | I6339  |           |
|          |        | I6350  |           |
|          |        | I63511 |           |
|          |        | I63512 |           |
|          |        | I63513 |           |

| Variable                 | ICD-9                                                                        | ICD-10                                                                                                                                                          | HCPCS/CPT      |
|--------------------------|------------------------------------------------------------------------------|-----------------------------------------------------------------------------------------------------------------------------------------------------------------|----------------|
|                          |                                                                              | I63519<br>I63521<br>I63522<br>I63523<br>I63529<br>I63531<br>I63532<br>I63533<br>I63539<br>I63541<br>I63542<br>I63543<br>I63549<br>I6359<br>I636<br>I638<br>I639 |                |
| <b>Unstable Angina</b>   | 411.1<br>411.81<br>411.89                                                    | I20.0<br>I24.0<br>I24.8<br>I25110<br>I25700<br>I25710<br>I25720<br>I25730<br>I25750<br>I25760<br>I25790                                                         |                |
| <b>Heart Failure</b>     | 428.**<br>402.11<br>402.91<br>404.01<br>404.91<br>404.03<br>404.13<br>404.93 | I50.*<br>I11.0*<br>I13.0*<br>I13.2*                                                                                                                             |                |
| <b>Revascularization</b> |                                                                              |                                                                                                                                                                 |                |
| <b>PCI</b>               | 0.66<br>1755                                                                 | 270346<br>027034Z                                                                                                                                               | 92973<br>C9600 |

| Variable | ICD-9 | ICD-10   | HCPCS/CPT |
|----------|-------|----------|-----------|
|          | 36.06 | 270356   | C9601     |
|          | 36.07 | 027035Z  | 92920     |
|          | 40    | 270366   | 92921     |
|          | 41    | 027036Z  | 92928     |
|          | 42    | 270376   | 92929     |
|          | 43    | 027037Z  | 92924     |
|          | 44    | 02703D6  | 92925     |
|          | 45    | 02703DZ  | 92933     |
|          | 46    | 2.70E+09 | 92934     |
|          | 47    | 02703EZ  | 92937     |
|          | 48    | 02703F6  | 92938     |
|          |       | 02703FZ  | 92941     |
|          |       | 02703G6  | 92943     |
|          |       | 02703GZ  | 92944     |
|          |       | 02703T6  | C9602     |
|          |       | 02703TZ  | C9603     |
|          |       | 02703Z6  | C9604     |
|          |       | 02703ZZ  | C9605     |
|          |       | 270446   | C9606     |
|          |       | 027044Z  | C9607     |
|          |       | 270456   | C9608     |
|          |       | 027045Z  | 92975     |
|          |       | 270466   | 92977     |
|          |       | 027046Z  | 92980     |
|          |       | 270476   | 92981     |
|          |       | 027047Z  | 92982     |
|          |       | 02704D6  | 92984     |
|          |       | 02704DZ  | 92995     |
|          |       | 2.70E+09 | 92996     |
|          |       | 02704EZ  | G0290     |
|          |       | 02704F6  | G0291     |
|          |       | 02704FZ  |           |
|          |       | 02704G6  |           |
|          |       | 02704GZ  |           |
|          |       | 02704T6  |           |
|          |       | 02704TZ  |           |
|          |       | 02704Z6  |           |
|          |       | 02704ZZ  |           |
|          |       | 271346   |           |

| Variable | ICD-9 | ICD-10   | HCPCS/CPT |
|----------|-------|----------|-----------|
|          |       | 027134Z  |           |
|          |       | 271356   |           |
|          |       | 027135Z  |           |
|          |       | 271366   |           |
|          |       | 027136Z  |           |
|          |       | 271376   |           |
|          |       | 027137Z  |           |
|          |       | 02713D6  |           |
|          |       | 02713DZ  |           |
|          |       | 2.71E+09 |           |
|          |       | 02713EZ  |           |
|          |       | 02713F6  |           |
|          |       | 02713FZ  |           |
|          |       | 02713G6  |           |
|          |       | 02713GZ  |           |
|          |       | 02713T6  |           |
|          |       | 02713TZ  |           |
|          |       | 02713Z6  |           |
|          |       | 02713ZZ  |           |
|          |       | 271446   |           |
|          |       | 027144Z  |           |
|          |       | 271456   |           |
|          |       | 027145Z  |           |
|          |       | 271466   |           |
|          |       | 027146Z  |           |
|          |       | 271476   |           |
|          |       | 027147Z  |           |
|          |       | 02714D6  |           |
|          |       | 02714DZ  |           |
|          |       | 2.71E+09 |           |
|          |       | 02714EZ  |           |
|          |       | 02714F6  |           |
|          |       | 02714FZ  |           |
|          |       | 02714G6  |           |
|          |       | 02714GZ  |           |
|          |       | 02714T6  |           |
|          |       | 02714TZ  |           |
|          |       | 02714Z6  |           |
|          |       | 02714ZZ  |           |

| Variable | ICD-9 | ICD-10   | HCPCS/CPT |
|----------|-------|----------|-----------|
|          |       | 272346   |           |
|          |       | 027234Z  |           |
|          |       | 272356   |           |
|          |       | 027235Z  |           |
|          |       | 272366   |           |
|          |       | 027236Z  |           |
|          |       | 272376   |           |
|          |       | 027237Z  |           |
|          |       | 02723D6  |           |
|          |       | 02723DZ  |           |
|          |       | 2.72E+09 |           |
|          |       | 02723EZ  |           |
|          |       | 02723F6  |           |
|          |       | 02723FZ  |           |
|          |       | 02723G6  |           |
|          |       | 02723GZ  |           |
|          |       | 02723T6  |           |
|          |       | 02723TZ  |           |
|          |       | 02723Z6  |           |
|          |       | 02723ZZ  |           |
|          |       | 272446   |           |
|          |       | 027244Z  |           |
|          |       | 272456   |           |
|          |       | 027245Z  |           |
|          |       | 272466   |           |
|          |       | 027246Z  |           |
|          |       | 272476   |           |
|          |       | 027247Z  |           |
|          |       | 02724D6  |           |
|          |       | 02724DZ  |           |
|          |       | 2.72E+09 |           |
|          |       | 02724EZ  |           |
|          |       | 02724F6  |           |
|          |       | 02724FZ  |           |
|          |       | 02724G6  |           |
|          |       | 02724GZ  |           |
|          |       | 02724T6  |           |
|          |       | 02724TZ  |           |
|          |       | 02724Z6  |           |

| Variable | ICD-9 | ICD-10   | HCPCS/CPT |
|----------|-------|----------|-----------|
|          |       | 02724ZZ  |           |
|          |       | 273346   |           |
|          |       | 027334Z  |           |
|          |       | 273356   |           |
|          |       | 027335Z  |           |
|          |       | 273366   |           |
|          |       | 027336Z  |           |
|          |       | 273376   |           |
|          |       | 027337Z  |           |
|          |       | 02733D6  |           |
|          |       | 02733DZ  |           |
|          |       | 2.73E+09 |           |
|          |       | 02733EZ  |           |
|          |       | 02733F6  |           |
|          |       | 02733FZ  |           |
|          |       | 02733G6  |           |
|          |       | 02733GZ  |           |
|          |       | 02733T6  |           |
|          |       | 02733TZ  |           |
|          |       | 02733Z6  |           |
|          |       | 02733ZZ  |           |
|          |       | 273446   |           |
|          |       | 027344Z  |           |
|          |       | 273456   |           |
|          |       | 027345Z  |           |
|          |       | 273466   |           |
|          |       | 027346Z  |           |
|          |       | 273476   |           |
|          |       | 027347Z  |           |
|          |       | 02734D6  |           |
|          |       | 02734DZ  |           |
|          |       | 2.73E+09 |           |
|          |       | 02734EZ  |           |
|          |       | 02734F6  |           |
|          |       | 02734FZ  |           |
|          |       | 02734G6  |           |
|          |       | 02734GZ  |           |
|          |       | 02734T6  |           |
|          |       | 02734TZ  |           |



| Variable    | ICD-9                                                                                                                             | ICD-10                                                                                                                                                                                                                                                             | HCPCS/CPT                                                                                                                                                                                              |
|-------------|-----------------------------------------------------------------------------------------------------------------------------------|--------------------------------------------------------------------------------------------------------------------------------------------------------------------------------------------------------------------------------------------------------------------|--------------------------------------------------------------------------------------------------------------------------------------------------------------------------------------------------------|
|             |                                                                                                                                   | 02734Z6<br>02734ZZ<br>02C03ZZ<br>02C04ZZ<br>02C13ZZ<br>02C14ZZ<br>02C23ZZ<br>02C24ZZ<br>02C33ZZ<br>02C34ZZ<br>X2C0361<br>X2C1361<br>X2C2361<br>X2C3361                                                                                                             |                                                                                                                                                                                                        |
| <b>CABG</b> | 361<br>3610<br>3611<br>3612<br>3613<br>3614<br>3615<br>3616<br>3617<br>3619<br>362<br>363<br>3631<br>3632<br>3633<br>3634<br>3639 | 210083<br>210088<br>210089<br>021008C<br>021008F<br>021008W<br>210093<br>210098<br>210099<br>021009C<br>021009F<br>021009W<br>02100A3<br>02100A8<br>02100A9<br>02100AC<br>02100AF<br><br>02100AW<br>02100J3<br>02100J8<br>02100J9<br>02100JC<br>02100JF<br>02100JW | 33510<br>33511<br>33512<br>33513<br>33514<br>33516<br>33517<br>33518<br>33519<br>33521<br>33522<br>33523<br>33533<br>33534<br>33535<br>33536<br>33508<br><br>S2205<br>S2206<br>S2207<br>S2208<br>S2209 |

| Variable | ICD-9 | ICD-10  | HCPCS/CPT |
|----------|-------|---------|-----------|
|          |       | 02100K3 |           |
|          |       | 02100K8 |           |
|          |       | 02100K9 |           |
|          |       | 02100KC |           |
|          |       | 02100KF |           |
|          |       | 02100KW |           |
|          |       | 02100Z3 |           |
|          |       | 02100Z8 |           |
|          |       | 02100Z9 |           |
|          |       | 02100ZC |           |
|          |       | 02100ZF |           |
|          |       | 210344  |           |
|          |       | 02103D4 |           |
|          |       | 210444  |           |
|          |       | 210483  |           |
|          |       | 210488  |           |
|          |       | 210489  |           |
|          |       | 021048C |           |
|          |       | 021048F |           |
|          |       | 021048W |           |
|          |       | 210493  |           |
|          |       | 210498  |           |
|          |       | 210499  |           |
|          |       | 021049C |           |
|          |       | 021049F |           |
|          |       | 021049W |           |
|          |       | 02104A3 |           |
|          |       | 02104A8 |           |
|          |       | 02104A9 |           |
|          |       | 02104AC |           |
|          |       | 02104AF |           |
|          |       | 02104AW |           |
|          |       | 02104D4 |           |
|          |       | 02104J3 |           |
|          |       | 02104J8 |           |
|          |       | 02104J9 |           |
|          |       | 02104JC |           |
|          |       | 02104JF |           |

| Variable | ICD-9 | ICD-10  | HCPCS/CPT |
|----------|-------|---------|-----------|
|          |       | 02104JW |           |
|          |       | 02104K3 |           |
|          |       | 02104K8 |           |
|          |       | 02104K9 |           |
|          |       | 02104KC |           |
|          |       | 02104KF |           |
|          |       | 02104KW |           |
|          |       | 02104Z3 |           |
|          |       | 02104Z8 |           |
|          |       | 02104Z9 |           |
|          |       | 02104ZC |           |
|          |       | 02104ZF |           |
|          |       | 211083  |           |
|          |       | 211088  |           |
|          |       | 211089  |           |
|          |       | 021108C |           |
|          |       | 021108F |           |
|          |       | 021108W |           |
|          |       | 211093  |           |
|          |       | 211098  |           |
|          |       | 211099  |           |
|          |       | 021109C |           |
|          |       | 021109F |           |
|          |       | 021109W |           |
|          |       | 02110A3 |           |
|          |       | 02110A8 |           |
|          |       | 02110A9 |           |
|          |       | 02110AC |           |
|          |       | 02110AF |           |
|          |       | 02110AW |           |
|          |       | 02110J3 |           |
|          |       | 02110J8 |           |
|          |       | 02110J9 |           |
|          |       | 02110JC |           |
|          |       | 02110JF |           |
|          |       | 02110JW |           |
|          |       | 02110K3 |           |
|          |       | 02110K8 |           |

| Variable | ICD-9 | ICD-10  | HCPCS/CPT |
|----------|-------|---------|-----------|
|          |       | 02110K9 |           |
|          |       | 02110KC |           |
|          |       | 02110KF |           |
|          |       | 02110KW |           |
|          |       | 02110Z3 |           |
|          |       | 02110Z8 |           |
|          |       | 02110Z9 |           |
|          |       | 02110ZC |           |
|          |       | 02110ZF |           |
|          |       | 211344  |           |
|          |       | 02113D4 |           |
|          |       | 211444  |           |
|          |       | 211483  |           |
|          |       | 211488  |           |
|          |       | 211489  |           |
|          |       | 021148C |           |
|          |       | 021148F |           |
|          |       | 021148W |           |
|          |       | 211493  |           |
|          |       | 211498  |           |
|          |       | 211499  |           |
|          |       | 021149C |           |
|          |       | 021149F |           |
|          |       | 021149W |           |
|          |       | 02114A3 |           |
|          |       | 02114A8 |           |
|          |       | 02114A9 |           |
|          |       | 02114AC |           |
|          |       | 02114AF |           |
|          |       | 02114AW |           |
|          |       | 02114D4 |           |
|          |       | 02114J3 |           |
|          |       | 02114J8 |           |
|          |       | 02114J9 |           |
|          |       | 02114JC |           |
|          |       | 02114JF |           |
|          |       | 02114JW |           |
|          |       | 02114K3 |           |

| Variable | ICD-9 | ICD-10  | HCPCS/CPT |
|----------|-------|---------|-----------|
|          |       | 02114K8 |           |
|          |       | 02114K9 |           |
|          |       | 02114KC |           |
|          |       | 02114KF |           |
|          |       | 02114KW |           |
|          |       | 02114Z3 |           |
|          |       | 02114Z8 |           |
|          |       | 02114Z9 |           |
|          |       | 02114ZC |           |
|          |       | 02114ZF |           |
|          |       | 212083  |           |
|          |       | 212088  |           |
|          |       | 212089  |           |
|          |       | 021208C |           |
|          |       | 021208F |           |
|          |       | 021208W |           |
|          |       | 212093  |           |
|          |       | 212098  |           |
|          |       | 212099  |           |
|          |       | 021209C |           |
|          |       | 021209F |           |
|          |       | 021209W |           |
|          |       | 02120A3 |           |
|          |       | 02120A8 |           |
|          |       | 02120A9 |           |
|          |       | 02120AC |           |
|          |       | 02120AF |           |
|          |       | 02120AW |           |
|          |       | 02120J3 |           |
|          |       | 02120J8 |           |
|          |       | 02120J9 |           |
|          |       | 02120JC |           |
|          |       | 02120JF |           |
|          |       | 02120JW |           |
|          |       | 02120K3 |           |
|          |       | 02120K8 |           |
|          |       | 02120K9 |           |
|          |       | 02120KC |           |

| Variable | ICD-9 | ICD-10  | HCPCS/CPT |
|----------|-------|---------|-----------|
|          |       | 02120KF |           |
|          |       | 02120KW |           |
|          |       | 02120Z3 |           |
|          |       | 02120Z8 |           |
|          |       | 02120Z9 |           |
|          |       | 02120ZC |           |
|          |       | 02120ZF |           |
|          |       | 212344  |           |
|          |       | 02123D4 |           |
|          |       | 212444  |           |
|          |       | 212483  |           |
|          |       | 212488  |           |
|          |       | 212489  |           |
|          |       | 021248C |           |
|          |       | 021248F |           |
|          |       | 021248W |           |
|          |       | 212493  |           |
|          |       | 212498  |           |
|          |       | 212499  |           |
|          |       | 021249C |           |
|          |       | 021249F |           |
|          |       | 021249W |           |
|          |       | 02124A3 |           |
|          |       | 02124A8 |           |
|          |       | 02124A9 |           |
|          |       | 02124AC |           |
|          |       | 02124AF |           |
|          |       | 02124AW |           |
|          |       | 02124D4 |           |
|          |       | 02124J3 |           |
|          |       | 02124J8 |           |
|          |       | 02124J9 |           |
|          |       | 02124JC |           |
|          |       | 02124JF |           |
|          |       | 02124JW |           |
|          |       | 02124K3 |           |
|          |       | 02124K8 |           |
|          |       | 02124K9 |           |

| Variable | ICD-9 | ICD-10  | HCPCS/CPT |
|----------|-------|---------|-----------|
|          |       | 02124KC |           |
|          |       | 02124KF |           |
|          |       | 02124KW |           |
|          |       | 02124Z3 |           |
|          |       | 02124Z8 |           |
|          |       | 02124Z9 |           |
|          |       | 02124ZC |           |
|          |       | 02124ZF |           |
|          |       | 213083  |           |
|          |       | 213088  |           |
|          |       | 213089  |           |
|          |       | 021308C |           |
|          |       | 021308F |           |
|          |       | 021308W |           |
|          |       | 213093  |           |
|          |       | 213098  |           |
|          |       | 213099  |           |
|          |       | 021309C |           |
|          |       | 021309F |           |
|          |       | 021309W |           |
|          |       | 02130A3 |           |
|          |       | 02130A8 |           |
|          |       | 02130A9 |           |
|          |       | 02130AC |           |
|          |       | 02130AF |           |
|          |       | 02130AW |           |
|          |       | 02130J3 |           |
|          |       | 02130J8 |           |
|          |       | 02130J9 |           |
|          |       | 02130JC |           |
|          |       | 02130JF |           |
|          |       | 02130JW |           |
|          |       | 02130K3 |           |
|          |       | 02130K8 |           |
|          |       | 02130K9 |           |
|          |       | 02130KC |           |
|          |       | 02130KF |           |

| Variable | ICD-9 | ICD-10  | HCPCS/CPT |
|----------|-------|---------|-----------|
|          |       | 02130KW |           |
|          |       | 02130Z3 |           |
|          |       | 02130Z8 |           |
|          |       | 02130Z9 |           |
|          |       | 02130ZC |           |
|          |       | 02130ZF |           |
|          |       | 213344  |           |
|          |       | 02133D4 |           |
|          |       | 213444  |           |
|          |       | 213483  |           |
|          |       | 213488  |           |
|          |       | 213489  |           |
|          |       | 021348C |           |
|          |       | 021348F |           |
|          |       | 021348W |           |
|          |       | 213493  |           |
|          |       | 213498  |           |
|          |       | 213499  |           |
|          |       | 021349C |           |
|          |       | 021349F |           |
|          |       | 021349W |           |
|          |       | 02134A3 |           |
|          |       | 02134A8 |           |
|          |       | 02134A9 |           |
|          |       | 02134AC |           |
|          |       | 02134AF |           |
|          |       | 02134AW |           |
|          |       | 02134D4 |           |
|          |       | 02134J3 |           |
|          |       | 02134J8 |           |
|          |       | 02134J9 |           |
|          |       | 02134JC |           |
|          |       | 02134JF |           |
|          |       | 02134JW |           |
|          |       | 02134K3 |           |
|          |       | 02134K8 |           |
|          |       | 02134K9 |           |
|          |       | 02134KC |           |



| Variable | ICD-9 | ICD-10                                                                    | HCPCS/CPT |
|----------|-------|---------------------------------------------------------------------------|-----------|
|          |       | 02134KF<br>02134KW<br>02134Z3<br>02134Z8<br>02134Z9<br>02134ZC<br>02134ZF |           |

**Supplementary Table 2. Complete case vs. imputed**

| Study Variables                         | Imputations              |                          |                          | Complete Case            |
|-----------------------------------------|--------------------------|--------------------------|--------------------------|--------------------------|
|                                         | <i>Imputation 1</i>      | <i>Imputation 2</i>      | <i>Imputation 3</i>      |                          |
| <b>Serum Creatinine*, mean (SD)</b>     | 1.044 ( $\pm 0.5168$ )   | 1.045 ( $\pm 0.5142$ )   | 1.046 ( $\pm 0.5173$ )   | 1.096 ( $\pm 0.5566$ )   |
| <b>Calculated eGFR</b>                  | 70.396 ( $\pm 23.7673$ ) | 70.335 ( $\pm 23.7376$ ) | 70.317 ( $\pm 23.7839$ ) | 64.610 ( $\pm 20.7015$ ) |
| <b><i>Race, n (%)</i></b>               |                          |                          |                          |                          |
| <b>White</b>                            | 289958 (79.92%)          | 289950 (79.92%)          | 289968 (79.93%)          | 288384 (79.93%)          |
| <b>Black</b>                            | 55082 (15.18%)           | 55065 (15.18%)           | 55060 (15.18%)           | 54757 (15.18%)           |
| <b>Other</b>                            | 17751 (4.89%)            | 17776 (4.90%)            | 17763 (4.90%)            | 17660 (4.89%)            |
| <b><i>Population Density, n (%)</i></b> |                          |                          |                          |                          |
| <b>Urban</b>                            | 230038 (63.41%)          | 229918 (63.37%)          | 229939 (63.38%)          | 224359 (63.37%)          |
| <b>Suburban</b>                         | 91087 (25.11%)           | 91195 (25.14%)           | 91205 (25.14%)           | 88991 (25.14%)           |
| <b>Rural</b>                            | 41666 (11.48%)           | 41678 (11.49%)           | 41647 (11.48%)           | 40671 (11.49%)           |

**Supplementary Table 3. Test versus holdout dataset**

| 12 month pre-index period       | <i>Study Population with T2D</i> |                                  |                                    |
|---------------------------------|----------------------------------|----------------------------------|------------------------------------|
|                                 | <i>Overall</i><br>n=114,649      | <i>TEST Dataset</i><br>n=106,346 | <i>Holdout Dataset*</i><br>n=8,303 |
| <i>Demographic</i>              |                                  |                                  |                                    |
| <b>Age in years</b>             |                                  |                                  |                                    |
| <b>Mean (SD)</b>                | 74.1 (±6.01)                     | 74.0 (±5.99)                     | 74.7 (±6.26)                       |
| <b>Median [25-75%]</b>          | 73 (69-78)                       | 73 (69-78)                       | 74 (69-79)                         |
| <b>Min, Max</b>                 | 65 , 89                          | 65 , 89                          | 65 , 89                            |
| <b>Age Category, n (%)</b>      |                                  |                                  |                                    |
| <b>65-69</b>                    | 31,460 (27.4%)                   | 29,306 (27.6%)                   | 2,154 (25.9%)                      |
| <b>70-74</b>                    | 35,269 (30.8%)                   | 32,911 (30.9%)                   | 2,358 (28.4%)                      |
| <b>75-79</b>                    | 24,289 (21.2%)                   | 22,520 (21.2%)                   | 1,769 (21.3%)                      |
| <b>80-84</b>                    | 15665 (13.7%)                    | 14,368 (13.5%)                   | 1,297 (15.6%)                      |
| <b>85-89</b>                    | 7,966 (6.9%)                     | 7,241 (6.8%)                     | 725 (8.7%)                         |
| <b>Female, n (%)</b>            | 58,695 (51.2%)                   | 54,438 (51.2%)                   | 4,257 (51.3%)                      |
| <b>Race/Ethnicity, n (%)</b>    |                                  |                                  |                                    |
| <b>White</b>                    | 91,841 (80.1%)                   | 84,384 (79.3%)                   | 7,457 (89.8%)                      |
| <b>Black</b>                    | 16,715 (14.6%)                   | 16,166 (15.2%)                   | 549 (6.6%)                         |
| <b>Other</b>                    | 5,475 (4.8%)                     | 5,214 (4.9%)                     | 261 (3.1%)                         |
| <b>Unknown/Missing</b>          | 618 (0.5%)                       | 582 (0.5%)                       | 36 (0.4%)                          |
| <b>Geographic region, n (%)</b> |                                  |                                  |                                    |
| <b>Northeast</b>                | 8,303 (7.2%)                     | 0 (0.0%)                         | 8,303 (100.0%)                     |
| <b>Midwest</b>                  | 25,526 (22.3%)                   | 25,526 (24.0%)                   | 0 (0.0%)                           |
| <b>South</b>                    | 70,471 (61.5%)                   | 70,471 (66.3%)                   | 0 (0.0%)                           |
| <b>West</b>                     | 10,349 (9.0%)                    | 10,349 (9.7%)                    | 0 (0.0%)                           |
| <b>Unknown/Missing</b>          | 0 (0.0%)                         | 0 (0.0%)                         | 0 (0.0%)                           |

| 12 month pre-index period                           | <i>Study Population with T2D</i> |                                  |                                    |
|-----------------------------------------------------|----------------------------------|----------------------------------|------------------------------------|
|                                                     | <i>Overall</i><br>n=114,649      | <i>TEST Dataset</i><br>n=106,346 | <i>Holdout Dataset*</i><br>n=8,303 |
| <b>Population density (member residence), n (%)</b> |                                  |                                  |                                    |
| <b>Urban</b>                                        | 12,961 (11.3%)                   | 12,097 (11.4%)                   | 0,864 (10.4%)                      |
| <b>Suburban</b>                                     | 28,520 (24.9%)                   | 26,077 (24.5%)                   | 2,443 (29.4%)                      |
| <b>Rural</b>                                        | 70,395 (61.4%)                   | 65,514 (61.6%)                   | 4,881 (58.8%)                      |
| <b>Unknown/Missing</b>                              | 2,773 (2.4%)                     | 2,658 (2.5%)                     | 115 (1.4%)                         |
| <b>Low Income/Dual Status, n (%)</b>                |                                  |                                  |                                    |
| <b>Low income subsidy (LIS) Only</b>                | 7,399 (6.5%)                     | 6,905 (6.5%)                     | 494 (6.0%)                         |
| <b>Dual eligibility (DE) Only</b>                   | 1,012 (0.9%)                     | 880 (0.8%)                       | 132 (1.6%)                         |
| <b>LIS and DE</b>                                   | 15,552 (13.6%)                   | 14,592 (13.7%)                   | 960 (11.6%)                        |
| <i>Baseline clinical characteristics</i>            |                                  |                                  |                                    |
| <b>Deyo Charlson Score</b>                          |                                  |                                  |                                    |
| <b>Mean (SD)</b>                                    | 1.2 ( $\pm$ 1.78)                | 1.2 ( $\pm$ 1.78)                | 1.2 ( $\pm$ 1.75)                  |
| <b>Median [IQR]</b>                                 | 0 (0-2)                          | 0 (0-2)                          | 0 (0-2)                            |
| <b>Min, Max</b>                                     | 0 , 18                           | 0 , 18                           | 0 , 16                             |
| <b>[Deyo Charlson categories, n (%)]</b>            |                                  |                                  |                                    |
| <b>Myocardial infarction (MI)</b>                   | 6,068 (5.3%)                     | 5,618 (5.3%)                     | 450 (5.4%)                         |
| <b>Congestive heart failure (CHF)</b>               | 13,562 (11.8%)                   | 12,568 (11.8%)                   | 994 (12.0%)                        |
| <b>Peripheral vascular disease (PVD)</b>            | 15,387 (13.4%)                   | 14,264 (13.4%)                   | 1,123 (13.5%)                      |
| <b>Cerebrovascular disease (CVD)</b>                | 9,760 (8.5%)                     | 9,054 (8.5%)                     | 706 (8.5%)                         |
| <b>Dementia</b>                                     | 1,956 (1.7%)                     | 1,815 (1.7%)                     | 141 (1.7%)                         |
| <b>Chronic obstructive pulmonary disease (COPD)</b> | 19,251 (16.8%)                   | 17,913 (16.8%)                   | 1,338 (16.1%)                      |
| <b>Connective Tissue Disease</b>                    | 2,451 (2.1%)                     | 2,281 (2.1%)                     | 170 (2.0%)                         |
| <b>Peptic ulcer disease (PUD)</b>                   | 881 (0.8%)                       | 831 (0.8%)                       | 50 (0.6%)                          |
| <b>Mild Liver Disease</b>                           | 2,307 (2.0%)                     | 2,148 (2.0%)                     | 159 (1.9%)                         |

| 12 month pre-index period                                                            | <i>Study Population with T2D</i> |                                  |                                    |
|--------------------------------------------------------------------------------------|----------------------------------|----------------------------------|------------------------------------|
|                                                                                      | <i>Overall</i><br>n=114,649      | <i>TEST Dataset</i><br>n=106,346 | <i>Holdout Dataset*</i><br>n=8,303 |
| <b>Para- or hemiplegia</b>                                                           | 838 (0.7%)                       | 778 (0.7%)                       | 60 (0.7%)                          |
| <b>Renal Disease</b>                                                                 | 21,010 (18.3%)                   | 19,680 (18.5%)                   | 1,330 (16.0%)                      |
| <b>Cancer</b>                                                                        | 9,561 (8.3%)                     | 8,880 (8.4%)                     | 681 (8.2%)                         |
| <b>Moderate or severe liver disease</b>                                              | 277 (0.2%)                       | 260 (0.2%)                       | 17 (0.2%)                          |
| <b>Metastatic carcinoma</b>                                                          | 981 (0.9%)                       | 917 (0.9%)                       | 64 (0.8%)                          |
| <b>Human Immunodeficiency Virus (HIV)/ Acquired Immunodeficiency Syndrome (AIDS)</b> | 53 (0.0%)                        | <50                              | <10                                |
| <b>Diabetes Complications and Severity Index (DCSI) Score</b>                        |                                  |                                  |                                    |
| <b>Mean (SD)</b>                                                                     | 1.7 ( $\pm$ 1.79)                | 1.7 ( $\pm$ 1.79)                | 1.6 ( $\pm$ 1.74)                  |
| <b>Median [IQR]</b>                                                                  | 1 (0-3)                          | 1 (0-3)                          | 1 (0-2)                            |
| <b>Min, Max</b>                                                                      | 0 , 11                           | 0 , 11                           | 0 , 10                             |
| <b>[DCSI categories, n (%)]</b>                                                      |                                  |                                  |                                    |
| <b>Retinopathy</b>                                                                   | 6,550 (5.7%)                     | 6,037 (5.7%)                     | 0,513 (6.2%)                       |
| <b>Nephropathy</b>                                                                   | 48,773 (42.5%)                   | 46,104 (43.4%)                   | 2,669 (32.1%)                      |
| <b>Neuropathy</b>                                                                    | 17,803 (15.5%)                   | 16,624 (15.6%)                   | 1,179 (14.2%)                      |
| <b>Cerebrovascular</b>                                                               | 39,888 (34.8%)                   | 36,880 (34.7%)                   | 3,008 (36.2%)                      |
| <b>Cardiovascular</b>                                                                | 7,672 (6.7%)                     | 7,099 (6.7%)                     | 0,573 (6.9%)                       |
| <b>Peripheral vascular disease</b>                                                   | 12,819 (11.2%)                   | 11,744 (11.0%)                   | 1,075 (12.9%)                      |
| <b>Metabolic</b>                                                                     | 408 (0.4%)                       | 378 (0.4%)                       | 30 (0.4%)                          |
| <b>Body mass index (BMI), n (%)</b>                                                  |                                  |                                  |                                    |
| <b>&lt;19</b>                                                                        | 284 (0.2%)                       | 273 (0.3%)                       | 11 (0.1%)                          |
| <b>19-24</b>                                                                         | 2,213 (1.9%)                     | 2,105 (2.0%)                     | 108 (1.3%)                         |
| <b>25-29</b>                                                                         | 5,014 (4.4%)                     | 4,813 (4.5%)                     | 201 (2.4%)                         |
| <b>30-39</b>                                                                         | 5,881 (5.1%)                     | 5,590 (5.3%)                     | 291 (3.5%)                         |

| 12 month pre-index period                                           | <i>Study Population with T2D</i> |                                  |                                    |
|---------------------------------------------------------------------|----------------------------------|----------------------------------|------------------------------------|
|                                                                     | <i>Overall</i><br>n=114,649      | <i>TEST Dataset</i><br>n=106,346 | <i>Holdout Dataset*</i><br>n=8,303 |
| ≥40                                                                 | 2,379 (2.1%)                     | 2,208 (2.1%)                     | 171 (2.1%)                         |
| Unknown/Missing                                                     | 98,878 (86.2%)                   | 91,357 (85.9%)                   | 7,521 (90.6%)                      |
| Obesity, n (%)                                                      | 18,811 (16.4%)                   | 17,548 (16.5%)                   | 1,263 (15.2%)                      |
| <i>Medications of interest</i>                                      |                                  |                                  |                                    |
| <b>Number of unique medications</b>                                 |                                  |                                  |                                    |
| Mean (SD)                                                           | 10.4 (±6.44)                     | 10.5 (±6.45)                     | 9.4 (±6.21)                        |
| Median [IQR]                                                        | 10 (6-14)                        | 10 (6-14)                        | 9 (5-13)                           |
| Min, Max                                                            | 0 , 57                           | 0 , 57                           | 0 , 43                             |
| <b>Anti-hyperglycemic medications, n (%)</b>                        |                                  |                                  |                                    |
| Biguanides                                                          | 49,630 (43.3%)                   | 46,149 (43.4%)                   | 3,481 (41.9%)                      |
| Sulfonylureas                                                       | 35,079 (30.6%)                   | 32,553 (30.6%)                   | 2,526 (30.4%)                      |
| Thiazolidinediones                                                  | 8,017 (7.0%)                     | 7,394 (7.0%)                     | 0,623 (7.5%)                       |
| DPP-4 inhibitors                                                    | 635 (0.6%)                       | 584 (0.5%)                       | 51 (0.6%)                          |
| SGLT2 inhibitors                                                    | 966 (0.8%)                       | 897 (0.8%)                       | 69 (0.8%)                          |
| GLP-1                                                               | 0 (0.0%)                         | 0 (0.0%)                         | 0 (0.0%)                           |
| Insulin                                                             | 18,676 (16.3%)                   | 17,302 (16.3%)                   | 1,374 (16.5%)                      |
| Fixed dose combinations                                             | 5,382 (4.7%)                     | 5,029 (4.7%)                     | 353 (4.3%)                         |
| Other (amylin agonists, meglitinides, alpha-glucosidase inhibitors) | 1,184 (1.0%)                     | 1,052 (1.0%)                     | 132 (1.6%)                         |
| <b>Cardiovascular Medications, n (%)</b>                            |                                  |                                  |                                    |
| ACE, ARB, Renin inhibitors                                          | 59,800 (52.2%)                   | 55,583 (52.3%)                   | 4,217 (50.8%)                      |
| Antianginal agents                                                  | 10,361 (9.0%)                    | 9,568 (9.0%)                     | 793 (9.6%)                         |
| Antiarrhythmics                                                     | 2,769 (2.4%)                     | 2,555 (2.4%)                     | 214 (2.6%)                         |
| Anticoagulants                                                      | 11,011 (9.6%)                    | 10,138 (9.5%)                    | 0,873 (10.5%)                      |
| Antihyperlipidemics (e.g., statins, fibrates)                       | 75,728 (66.1%)                   | 70,351 (66.2%)                   | 5,377 (64.8%)                      |

| 12 month pre-index period                                      | <i>Study Population with T2D</i> |                                  |                                    |
|----------------------------------------------------------------|----------------------------------|----------------------------------|------------------------------------|
|                                                                | <i>Overall</i><br>n=114,649      | <i>TEST Dataset</i><br>n=106,346 | <i>Holdout Dataset*</i><br>n=8,303 |
| <b>Beta blockers</b>                                           | 47,966 (41.8%)                   | 44,437 (41.8%)                   | 3,529 (42.5%)                      |
| <b>Calcium channel blockers</b>                                | 34,390 (30.0%)                   | 32,204 (30.3%)                   | 2,186 (26.3%)                      |
| <b>Cardiotonics</b>                                            | 4,328 (3.8%)                     | 4,013 (3.8%)                     | 315 (3.8%)                         |
| <b>Diuretics</b>                                               | 42,604 (37.2%)                   | 39,681 (37.3%)                   | 2,923 (35.2%)                      |
| <b>Other antihypertensives</b>                                 | 30,579 (26.7%)                   | 28,727 (27.0%)                   | 1,852 (22.3%)                      |
| <b>Vasopressors</b>                                            | 470 (0.4%)                       | 436 (0.4%)                       | 34 (0.4%)                          |
| <b>Cardiovascular Agents-Misc</b>                              | 2,508 (2.2%)                     | 2,374 (2.2%)                     | 134 (1.6%)                         |
| <b>Smoking, n (%)</b>                                          | 10,964 (9.6%)                    | 10,248 (9.6%)                    | 716 (8.6%)                         |
| <b>Laboratory Values of Interest, n (%)</b>                    |                                  |                                  |                                    |
| <b>Hemoglobin A1c (HbA1c), n (%)</b>                           | 52,234 (45.6%)                   | 49,569 (46.6%)                   | 2,665 (32.1%)                      |
| <b>Low-density lipoprotein cholesterol (LDL-C), n (%)</b>      | 53,549 (46.7%)                   | 50,931 (47.9%)                   | 2,618 (31.5%)                      |
| <b>High-density lipoprotein cholesterol (HDL-C), n (%)</b>     | 53,612 (46.8%)                   | 50,965 (47.9%)                   | 2,647 (31.9%)                      |
| <b>Triglycerides, n (%)</b>                                    | 53,311 (46.5%)                   | 50,661 (47.6%)                   | 2,650 (31.9%)                      |
| <b>Total cholesterol, n (%)</b>                                | 53,867 (47.0%)                   | 51,210 (48.2%)                   | 2,657 (32.0%)                      |
| <b>Estimated glomerular filtration rate (eGFR), n (%)</b>      | 59,995 (52.3%)                   | 57,071 (53.7%)                   | 2,924 (35.2%)                      |
| <b>Systolic blood pressure, n (%)</b>                          | 147 (0.1%)                       | <150                             | <10                                |
| <b>Diastolic blood pressure, n (%)</b>                         | 147 (0.1%)                       | <150                             | <10                                |
| <b>Laboratory Values of Interest, Mean (SD)</b>                |                                  |                                  |                                    |
| <b>Hemoglobin A1c (HbA1c), Mean (SD)</b>                       | 6.9 (±1.22)                      | 6.9 (±1.22)                      | 6.9 (±1.24)                        |
| <b>Low density lipoprotein cholesterol (LDL-C), Mean (SD)</b>  | 91.3 (±32.98)                    | 91.4 (±32.95)                    | 91.2 (±33.57)                      |
| <b>High density lipoprotein cholesterol (HDL-C), Mean (SD)</b> | 49.0 (±14.57)                    | 49.0 (±14.57)                    | 49.6 (±14.60)                      |
| <b>Triglycerides, Mean (SD)</b>                                | 148.9 (±85.71)                   | 148.8 (±85.79)                   | 151.0 (±84.24)                     |

| 12 month pre-index period                                     | <i>Study Population with T2D</i> |                                  |                                    |
|---------------------------------------------------------------|----------------------------------|----------------------------------|------------------------------------|
|                                                               | <i>Overall</i><br>n=114,649      | <i>TEST Dataset</i><br>n=106,346 | <i>Holdout Dataset*</i><br>n=8,303 |
| <b>Total cholesterol, Mean (SD)</b>                           | 169.8 (±40.26)                   | 169.8 (±40.22)                   | 170.6 (±40.95)                     |
| <b>Estimated glomerular filtration rate (eGFR), Mean (SD)</b> | 66.7 (±21.43)                    | 66.7 (±21.47)                    | 65.2 (±20.63)                      |
| <b>Systolic blood pressure, Mean (SD)</b>                     | 133.8 (±21.29)                   | 133.6 (±21.32)                   | 150.0 (±14.14)                     |
| <b>Diastolic blood pressure, Mean (SD)</b>                    | 73.6 (±13.52)                    | 73.5 (±13.51)                    | 76.5 (±19.09)                      |
| <b><i>All-cause Healthcare Resource Utilization</i></b>       |                                  |                                  |                                    |
| <b>Inpatient Hospitalization, n (%)</b>                       | 21,608 (18.8%)                   | 19,995 (18.8%)                   | 1,613 (19.4%)                      |
| <b><i>Inpatient Hospitalization</i></b>                       |                                  |                                  |                                    |
| <b>Mean (SD)</b>                                              | 0.3 (±0.75)                      | 0.3 (±0.75)                      | 0.3 (±0.76)                        |
| <b>Median [IQR]</b>                                           | 0 (0-0)                          | 0 (0-0)                          | 0 (0-0)                            |
| <b>Min, Max</b>                                               | 0 , 27                           | 0 , 27                           | 0 , 9                              |
| <b><i>ED visits</i></b>                                       |                                  |                                  |                                    |
| <b>Mean (SD)</b>                                              | 0.7 (±1.59)                      | 0.7 (±1.60)                      | 0.7 (±1.56)                        |
| <b>Median [IQR]</b>                                           | 0 (0-1)                          | 0 (0-1)                          | 0 (0-1)                            |
| <b>Min, Max</b>                                               | 0 , 85                           | 0 , 85                           | 0 , 33                             |
| <b><i>Physician encounters</i></b>                            |                                  |                                  |                                    |
| <b>Mean (SD)</b>                                              | 8.4 (±6.86)                      | 8.5 (±6.91)                      | 7.9 (±6.22)                        |
| <b>Median [IQR]</b>                                           | 7 (4-11)                         | 7 (4-11)                         | 6 (4-11)                           |
| <b>Min, Max</b>                                               | 0 , 153                          | 0 , 153                          | 0 , 63                             |
| <b><i>Outpatient visits</i></b>                               |                                  |                                  |                                    |
| <b>Mean (SD)</b>                                              | 15.5 (±14.04)                    | 15.5 (±14.02)                    | 15.9 (±14.30)                      |
| <b>Median [IQR]</b>                                           | 12 (7-20)                        | 12 (7-20)                        | 12 (7-21)                          |
| <b>Min, Max</b>                                               | 0 , 357                          | 0 , 357                          | 0 , 262                            |

ACE, angiotensin converting enzyme inhibitor; ARB, angiotensin receptor blocker; DCI, Deyo-Charlson Comorbidity Index; DCSI, Diabetes Complications and Severity Index; DPP-4, Dipeptidyl peptidase-4; ED, emergency department; GLP-1, glucagon like peptide 1; HbA1c, hemoglobin A1c; IQR, interquartile range; LDL, low density lipoprotein cholesterol; SD, standard deviation; SGLT2, sodium glucose cotransporter-2



\*Holdout dataset were patients from the Northeast

**Supplementary Table 4. Model performance statistics**

| Measure                | Train<br>(N=248,142) | Test<br>(n=106,346) | Holdout<br>(n=8,303) |
|------------------------|----------------------|---------------------|----------------------|
| Sensitivity            | 0.6290               | 0.6243              | 0.6281               |
| Specificity            | 0.6290               | 0.6234              | 0.6258               |
| Accuracy               | 0.6290               | 0.6235              | 0.6263               |
| Misclassification Rate | 0.3710               | 0.3765              | 0.3737               |

**Supplementary Figure 1. Kaplan-Meier Survival Curves for CV Events Occurring up to 5 Years**

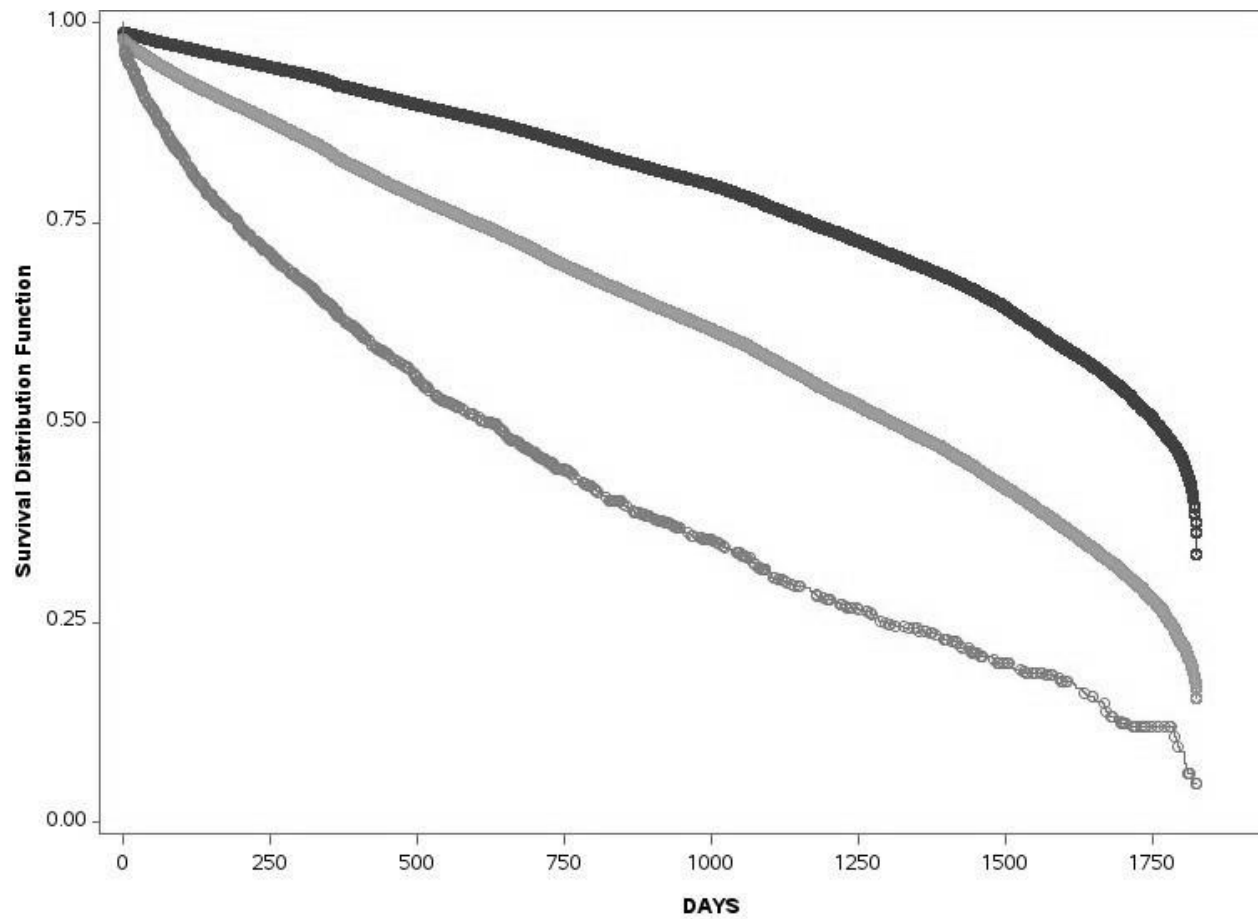

Bottom=high-risk, middle=moderate-risk, top=low-risk

*CV, cardiovascular*
